# Supplementary material
Source: PubMed Central journal article supplement (PMC9923625)
Supplement: PEDS_20150463SupplementaryData.pdf [file PEDS_20150463SupplementaryData.pdf]

## Supplemental Information

### INSTITUTIONS PARTICIPATING IN THE PEDIATRIC RESEARCH SEDATION CONSORTIUM, NOVEMBER 2012 TO APRIL 2014

Akron Children's Hospital, Akron, OH  
 American Family Children's Hospital,  
 Madison, WI  
 Avera McKennan Hospital, Sioux  
 Falls, SD  
 Cape Fear Valley Medical Center,  
 Fayetteville, NC  
 Children's Healthcare of Atlanta at  
 Egleston, Atlanta, GA  
 Children's Healthcare of Atlanta at  
 Scottish Rite, Atlanta, GA  
 Children's Hospital at Memorial  
 University Medical Center, Savannah,  
 GA  
 Children's Hospital Colorado, Aurora,  
 CO  
 Children's Hospital Navicent Health,  
 Macon, GA  
 Children's Hospital of the Greenville  
 Hospital System, Greenville, SC  
 Children's Hospital of The King's  
 Daughters, Norfolk, VA  
 Children's Hospitals and Clinics of  
 Minnesota, Minneapolis, MN  
 Children's of Alabama, Birmingham,  
 AL  
 Connecticut Children's Medical  
 Center, Hartford, CT  
 Dartmouth Hitchcock Medical Center,  
 Lebanon, NH  
 Doernbecher Children's Hospital,  
 Portland, OR

Dr. Alan R. Milnes, Kelowna, BC,  
 Canada  
 East Tennessee Children's Hospital,  
 Knoxville, TN  
 Eastern Maine Medical Center,  
 Bangor, ME  
 Florida Hospital for Children,  
 Orlando, FL  
 Gundersen Lutheran, LaCrosse, WI  
 Helen DeVos Children's Hospital,  
 Grand Rapids, MI  
 Holtz Children's Hospital, Miami, FL  
 Kentucky Children's Hospital,  
 Lexington, KY  
 Kosair Children's Hospital, Louisville,  
 KY  
 Maricopa Integrated Health System  
 Arizona Children's Center, Phoenix,  
 AZ  
 Memorial Children's Hospital, South  
 Bend, IN  
 Monroe Carell Jr. Children's Hospital  
 at Vanderbilt, Nashville, TN  
 Nationwide Children's Hospital,  
 Columbus, OH  
 Nemours/Alfred I. DuPont Hospital  
 for Children, Wilmington, DE  
 New York-Presbyterian Morgan  
 Stanley Children's Hospital  
 (Columbia University Medical  
 Center), New York, NY  
 North Central Baptist Hospital, San  
 Antonio, TX  
 Palmetto Health Richland Memorial  
 Hospital, Columbia, SC

**SUPPLEMENTAL TABLE 7** Data Elements  
 Collected for PSRC

---

|                                                     |
|-----------------------------------------------------|
| Age                                                 |
| Weight                                              |
| Gender                                              |
| PS                                                  |
| Primary diagnosis                                   |
| Coexisting diagnoses                                |
| Procedures performed                                |
| Sedation location                                   |
| Medications used                                    |
| Monitor type                                        |
| Provider responsible for sedation oversight         |
| Provider delivering sedation                        |
| Provider monitoring the patient during sedation     |
| Is the sedation supervisor performing<br>procedure? |
| Planned airway management                           |
| Planned depth of sedation                           |
| Sedation start time                                 |
| Procedure end time                                  |
| Discharge time                                      |
| Nil per os (NPO) interval for liquids               |
| Nil per os (NPO) interval for solids                |
| Complications                                       |
| 1. (Unexpected) airway management                   |
| 2. Transport during sedation                        |
| 3. Conditions produced during the procedure         |

---

Rainbow Babies and Children's  
 Hospital, Cleveland, OH  
 St. Vincent Hospital, Green Bay, WI  
 The Children's Hospital at  
 Providence, Anchorage, AK  
 UNC Health Care, Chapel Hill, NC  
 UVA Children's Hospital,  
 Charlottesville, VA  
 Wake Forest Brenner Children's,  
 Winston-Salem, NC  
 WakeMed Children's Hospital,  
 Raleigh, NC  
 WVU Children's Hospital,  
 Morgantown, WV
